# Supplementary material
Source: PubMed Central journal article supplement (PMC5407075)

## Supporting information

**Extracellular vesicles released by hepatocytes from gastric infusion model of ALD contain a miRNA barcode that can be detected in blood.**

**Akiko Eguchi<sup>1</sup>, Raul G Lazaro<sup>2</sup>, Jiaohong Wang<sup>2</sup>, Jihoon Kim<sup>3</sup>, Davide Povero<sup>1</sup>, Brandon Williams<sup>4</sup>, Samuel B Ho<sup>4,5</sup>, Peter Stärkel<sup>6</sup>, Bernd Schnabl<sup>4,5</sup>, Lucila Ohno-Machado<sup>3</sup>, Hidekazu Tsukamoto<sup>2,7</sup> and Ariel E. Feldstein<sup>1</sup>**

1. Department of Pediatrics, University of California San Diego, La Jolla, California, USA
2. Southern California Research Center for ALPD and Cirrhosis and Departments of Pathology, Keck School of Medicine of the University of Southern California, Los Angeles, California, USA
3. Department of Biomedical Informatics, University of California San Diego, La Jolla, California, USA
4. Department of Medicine, University of California San Diego, La Jolla, California, USA
5. Department of Medicine, VA San Diego Healthcare System, San Diego, California, USA
6. St. Luc University Hospital, Université Catholique de Louvain, Brussels 1200, Belgium
7. Department of Veterans Affairs, Greater Los Angeles Healthcare System, Los Angeles, California, USA

## Supporting Figure legends

**Supporting Fig. S1. Morphology of isolated hepatocytes:** Morphology of isolated hepatocytes from pair-fed control or ASH mice after 24 hr.

**Supporting Fig. S2. Quantification of protein expressions:** Quantification of western blots of cleaved caspase 3 and phospho-MYPT in isolated hepatocytes from pair-fed control or ASH mice. Values represent mean  $\pm$  S.E.M. \* $p < 0.05$ .

Isolated hepatocytes

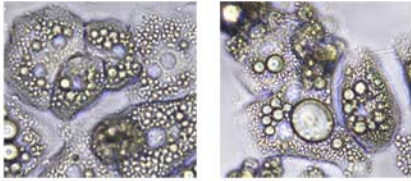

Cont

ASH

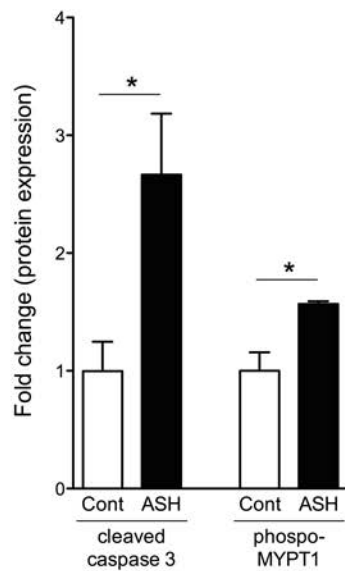

Supplement: NIHMS818012-supplement-Supp_info.pdf [file NIHMS818012-supplement-Supp_info.pdf]
